# Supplementary material for: Trends in In-Hospital Cardiopulmonary Resuscitation from 2010 through 2019: A Nationwide Cohort Study in South Korea
Source: MDPI journal article supplement (doi:10.3390/jpm12030377), 2022-03-01
Supplement: s1 [file s1]

Table S5. Main diagnosis at ICPR from 2010 to 2019

|                        | 2010  | 2011  | 2012  | 2013  | 2014  | 2015  | 2016  | 2017  | 2018  | 2019  |
|------------------------|-------|-------|-------|-------|-------|-------|-------|-------|-------|-------|
| Cardiovascular disease | 29.3% | 29.3% | 30.6% | 31.5% | 32.2% | 32.7% | 45.2% | 46.1% | 44.4% | 47.3% |
| Respiratory disease    | 16.2% | 16.3% | 17.1% | 16.6% | 16.2% | 16.8% | 11.5% | 11.2% | 12.9% | 11.2% |
| Cancer                 | 14.8% | 14.5% | 13.6% | 12.7% | 12.8% | 12.3% | 9.2%  | 8.9%  | 9.3%  | 9.0%  |
| Other                  | 39.8% | 39.8% | 38.8% | 39.1% | 38.9% | 38.3% | 34.1% | 33.8% | 33.4% | 32.5% |

ICPR, in-hospital cardiopulmonary resuscitation
