# Supplementary material for: Trends in In-Hospital Cardiopulmonary Resuscitation from 2010 through 2019: A Nationwide Cohort Study in South Korea
Source: MDPI journal article supplement (doi:10.3390/jpm12030377), 2022-03-01
Supplement: s1 [file s1]

Table S4. Mean value of total cost of hospitalization at ICPR from 2010 to 2019 by USD

|               | 2010   | 2011   | 2012   | 2013   | 2014   | 2015    | 2016    | 2017    | 2018    | 2019    |
|---------------|--------|--------|--------|--------|--------|---------|---------|---------|---------|---------|
| Mean value    | 5822.8 | 6123.2 | 6381.8 | 6499.8 | 6929.1 | 7592.5  | 5982.7  | 6380.6  | 7339.7  | 7886.2  |
| of total cost |        |        |        |        |        |         |         |         |         |         |
| SD            | 7493.4 | 8061.7 | 8334.5 | 8513.5 | 8978.9 | 10078.5 | 10014.1 | 11160.8 | 11810.1 | 13071.6 |

ICPR, in-hospital cardiopulmonary resuscitation; USD, United states dollars; SD, standard deviation
