# Supplementary material for: Trends in In-Hospital Cardiopulmonary Resuscitation from 2010 through 2019: A Nationwide Cohort Study in South Korea
Source: MDPI journal article supplement (doi:10.3390/jpm12030377), 2022-03-01
Supplement: s1 [file s1]

Table S2. Prevalence of ICPR in South Korea among the adult population from 2010 to 2019.

| Year                     | 2010       | 2011       | 2012       | 2013       | 2014       | 2015       | 2016       | 2017       | 2018       | 2019       |
|--------------------------|------------|------------|------------|------------|------------|------------|------------|------------|------------|------------|
| ICPR cases               | 24486      | 24169      | 24606      | 24092      | 23696      | 23811      | 35880      | 35894      | 41609      | 40433      |
| Population               | 40,359,211 | 40,813,272 | 41,256,396 | 41,709,764 | 42,141,075 | 42,567,533 | 42,960,165 | 43,298,097 | 43,649,724 | 43,920,954 |
| Prevalence<br>per 10,000 | 60.7       | 59.2       | 59.6       | 57.8       | 56.2       | 55.9       | 83.5       | 82.9       | 95.3       | 92.1       |

ICPR, In-hospital cardiopulmonary resuscitation
