# Supplementary material for: Trends in In-Hospital Cardiopulmonary Resuscitation from 2010 through 2019: A Nationwide Cohort Study in South Korea
Source: MDPI journal article supplement (doi:10.3390/jpm12030377), 2022-03-01
Supplement: s1 [file s1]

Table S6. Trends in the duration of ICPR from 2010 to 2019

[illegible]
